1 **World Health Organization Danger Signs to predict bacterial sepsis in newborns: A pragmatic**  
2 **prospective cohort study**

3  
4 Omolabake Akinseye, MBBS<sup>1,#</sup>, Constantin R. Popescu, MD, MSc<sup>2,3,#</sup>, Msandeni Chiume-Kayuni  
5 MMED Peads, MSc<sup>4,5</sup>, Michael A. Irvine, PhD<sup>6,7</sup>, Norman Lufesi DCM, MPhil<sup>8</sup>, Tisungane Mvalo,  
6 MBBS, MMED<sup>9,10</sup>, Niranjan Kissoon, MD, MCCM<sup>1,2</sup>, Matthew O. Wiens, PharmD, PhD<sup>11</sup>, Pascal M.  
7 Lavoie, MDCM, PhD<sup>1,2,\*</sup>

8  
9 # contributed equally as co-first authors

10  
11 **Affiliations:**

12 <sup>1</sup> Department of Pediatrics, Faculty of Medicine, University of British Columbia, Vancouver, Canada

13 <sup>2</sup> British Columbia Children's Hospital Research Institute, Vancouver, Canada

14 <sup>3</sup> Department of Pediatrics, Université Laval, Québec, Canada

15 <sup>4</sup> Department of Pediatrics, Kamuzu Central Hospital, Lilongwe, Malawi

16 <sup>5</sup> Kamuzu University of Health Sciences, Lilongwe, Malawi

17 <sup>6</sup> British Columbia Centre for Disease Control, Vancouver, Canada

18 <sup>7</sup> Faculty of Health Sciences, Simon Fraser University, Burnaby, Canada

19 <sup>8</sup> Department of Curative and Medical Rehabilitation, Ministry of Health, Lilongwe, Malawi

20 <sup>9</sup> University of North Carolina Project Malawi, Lilongwe, Malawi

21 <sup>10</sup> Department of Pediatrics, University of North Carolina at Chapel Hill School of Medicine, Chapel  
22 Hill, NC, USA

23 <sup>11</sup> Department of Anesthesiology, Pharmacology & Therapeutics, Faculty of Medicine, University of  
24 British Columbia, Vancouver, Canada

25  
26 **\*Corresponding author:** Dr. Pascal M. Lavoie  
27 BC Children's Hospital Research Institute  
28 4th Floor, Translational Research Building  
29 950 West 28th Avenue  
30 Vancouver, British Columbia V5Z 4H4, Canada  
31 Email: [plavoie@bcchr.ca](mailto:plavoie@bcchr.ca)  
32 Fax: +1-604-875-3106

33  
34 **Short title:** Prediction of bacterial sepsis in infants.

35  
36 **Conflict of Interest Statement:** The authors declare no conflicts of interest.

37  
38 **Funding Support:** This study was supported by a grant from Grand Challenges Canada (R-ST-POC-  
39 1707-04630). PML is supported by the BC Children's Hospital Research Foundation through the  
40 Investigator Grant Award Program. CRP was funded by a Sue Carruthers Graduate Studentship from  
41 the BC Children's Hospital Foundation. The other authors received no additional funding.

42  
43 **Role of Funder/Sponsor:** The funder/sponsor did not participate in the work.

44  
45 **Abbreviations:** WHO: World Health Organization; DS: danger signs; LMICs: low and middle-income  
46 countries; CSF: cerebrospinal fluid; AUC-ROC: Area Under Curve – Receiver Operator  
47 Characteristics; bpm: breaths per minute.

48

49 **Abstract**

50

51 Background: The World Health Organization (WHO) has developed danger signs (DS) to help front-  
52 line health workers triage interventions in children with severe illnesses. Our objective was to evaluate  
53 the extent to which DS predict bacterial sepsis in young infants presenting with acute illness.

54

55 Methodology/Principal Findings: This prospective study evaluated nine DS in infants younger than 3  
56 months with suspected sepsis in a large regional hospital in Lilongwe, Malawi, between June 2018 and  
57 April 2020. The main outcomes were positive blood or cerebrospinal fluid (CSF) cultures and  
58 mortality. Blood (n=85/401) and CSF (n=2/204) cultures were positive in 21.2% and 1% of infants,  
59 respectively (N=401; gestational age mean  $\pm$  SD: 37.1 $\pm$ 3.3 weeks, birth weight 2865 $\pm$ 785 grams). In-  
60 hospital deaths occurred in 9.7% (N=39/401) of infants (61.5% within 48h of admission). In univariate  
61 analyses, all DS were associated with mortality except for temperature instability and tachypnea,  
62 whereas “infant was unable to feed” was the only DS significantly associated with bacterial sepsis.  
63 After co-variable adjustments, number of DS predicted mortality (OR: 1.75; 95%CI: 1.43–2.16;  
64  $p < 0.001$ ; AUC-ROC: 0.756) but not positive cultures (OR 1.08; 95%CI: 0.92–1.30;  $p = 0.336$ ). Whether  
65 potential bacterial contaminants were included or not did not change results meaningfully.

66

67 Conclusion/Significance: DS predicted fatal outcomes but not positive cultures in a large regional  
68 hospital setting. These data imply that the incidence of bacterial sepsis and attributable mortality are  
69 unlikely to be accurate based on clinical signs alone, in infants in LMIC settings.

## 70 **Introduction**

71 Three million children die each year worldwide in their first month of age, with a significant proportion  
72 of these deaths occurring during the first week(1). Severe infections (including sepsis, pneumonia,  
73 diarrhea and viral diseases) are common causes of serious illnesses in young infants (2). Up to 25% of  
74 cases in low- and middle-income countries (LMICs) have identified bacterial causes (3). However, the  
75 lack of diagnostic resources, particularly in LMICs makes it difficult to accurately quantify this burden.  
76 This gap has enormous implications in terms of implementing policies and guidelines for the use of  
77 antimicrobials to prevent these deaths (1). At the individual level, identifying bacterial causes for sepsis  
78 is crucial to prevent fatalities and guide the correct empiric antibiotic therapy in the context of rising  
79 antimicrobial resistance. Indeed, the misuse, or even the overuse, of antibiotics carries a risk of  
80 subsequent treatment failure due to colonization by resistant bacteria (4, 5).

81

82 To assist front-line health workers, the World Health Organization (WHO) and United Nations  
83 International Children's Emergency Fund developed algorithms in the early 1990s to help triage  
84 interventions for sick children (6). This Integrated Management of Childhood Illness (IMCI) strategy  
85 included the identification of clinical signs to alert the need for escalation of care, later termed Danger  
86 Signs (DS) (6). Subsequently, the Young Infant Clinical Signs Study Group carried out a multi-  
87 centered study in six LMICs and found that seven signs (i.e., history of difficulty feeding, grunting,  
88 convulsions, movement only when stimulated, respiratory rate  $\geq 60$  breaths per minute (bpm), severe  
89 chest indrawing, temperature below  $35.5^{\circ}\text{C}$  or above  $37.5^{\circ}\text{C}$ , prolonged capillary refill, cyanosis and  
90 stiff limbs) best predicted the need for higher level of care, with a sensitivity of 74% to 85%, and  
91 specificity of 75% to 79%, depending on infants' age (i.e., 0 to 6 days versus 7 to 59 days old) (7). A  
92 systematic review of five studies on 17,506 infants found similar results (8).

93 Over time, the use of DS has been extended to provide a reasonable basis for the initiation of empiric  
94 antibiotic treatment (9). However, these signs have neither been developed nor validated to diagnose  
95 sepsis of bacterial etiology. Neonatal disorders such as transient tachypnea of the newborn,  
96 hypoglycemia, hyaline membrane disease, birth asphyxia, and viral infections (to mention only a few),  
97 present in a fashion similar to bacterial sepsis (10). Hence, a key question is whether DS can  
98 reasonably identify newborns or young infants who truly benefit from antibiotic treatment. Only a few  
99 studies have attempted to answer this question, but certainly none that have, to the best of our  
100 knowledge, been conducted prospectively, in a pragmatic setting where clinicians, not research staff,  
101 pragmatically reported DS (11).

102

103 The objective of this study was to prospectively determine the extent to which WHO DS predict  
104 bacterial sepsis in young infants, in a LMIC hospital setting where front-line health workers were asked  
105 to assess and record the presence of DS in infants who presented with suspected sepsis.

106

## 107 **Materials and Methods**

108 Study design, setting & population: This study was a pragmatic cohort study, and secondary analysis of  
109 data from a parent study that aimed to identify molecular signatures of bacterial sepsis in young infants  
110 with suspected sepsis (12). In the parent study, infants below 3 months of age were sequentially  
111 enrolled “around the clock” at the time they presented with suspected sepsis before, to the neonatal or  
112 pediatric units at Kamuzu Central Hospital in Lilongwe, Malawi between June 5<sup>th</sup>, 2018, and April 6<sup>th</sup>,  
113 2020. To minimize bias towards false-negative blood culture, infants were excluded if they had  
114 received antibiotics for >4 hours at the time of enrollment. In the original (parent) study, about 851  
115 infants presented with suspected sepsis and the vast majority were not enrolled because staff were

116 unable to get consent - either parents declined or the conditions were not sufficiently permissive for  
117 proper consent due to other clinical demands. Enrolled infants were followed during hospitalization.

118

119 The Kamuzu Central Hospital the largest referral hospital in central Malawi, where approximately  
120 3,000 infants are admitted to its neonatal unit annually. “Suspected sepsis” was defined as per the  
121 clinical staff, essentially in an infant that looked unwell where bacterial sepsis could not be excluded  
122 clinically. Before the study, the staff at Kamuzu Central Hospital did not have routinely access to blood  
123 culture or other ancillary tests, IV fluids and gavage feeds were also most often not available due to  
124 limited resources and supplies. Available interventions include antibiotics, assistance with feeding and  
125 routine surgeries when necessary. Oxygen and continuous positive pressure ventilation were only  
126 available to an extremely limited number of infants, on a limited basis when the hospital had electrical  
127 power. Invasive mechanical ventilation was not possible. Written informed consent was obtained from  
128 all parents/guardian of each participant, in English or Chichewa (main local language). During the  
129 study, the authors did not have access to information that could identify participants, with the exception  
130 of the consent forms who were kept under the responsibility of the local study PI (MCK). The study  
131 was approved by the University of British Columbia’s Children’s and Women’s Research Ethics Board  
132 (#H16-02639) and the National Health Science Research Committee of Malawi (#17/8/1819).

133

134 Clinical data and blood samples collection: Each infant had an initial clinical evaluation by a healthcare  
135 worker (or staff, either a nurse or clinical officer), and the presence of the following DS were  
136 prospectively collected using electronic forms, on a tablet device: history of poor feeding (interviewing  
137 the parent/caregiver), entered as “feeding well”, “unable to feed” or “uninterested in feeding”,  
138 respiratory rate (visually counted by attended clinician), axillary body temperature (measured using an  
139 electronic Welch Allyn SureTemp thermometer, model 692), drowsiness/difficulty to wake, grunting,

140 severe chest recession, central cyanosis and convulsions (defined pragmatically by attending clinician).  
141 All infants also had a standardized aerobic blood culture (minimum 2 mL of blood) collected within 4  
142 hours of presentation, using a rigorously implemented aseptic protocol (with in-training of all front-line  
143 healthcare providers prior to study initiation), as detailed (13). Infants also had cerebrospinal fluid  
144 (CSF) and urine cultures collected as clinically indicated. Fast breathing was defined as a respiratory  
145 rate of  $\geq 60$  bpm. Temperature instability was defined as a body temperature  $< 35.5^{\circ}\text{C}$  or  $> 38^{\circ}\text{C}$ .  
146 Blood cultures were processed into BACTEC PEDS Plus culture bottles incubated in a BD BACTEC  
147 9050 instrument. In keeping with a pragmatic design, the study did not attempt to enforce strict criteria  
148 to define DS or illness status. Identification of organisms from blood or CSF cultures was completed  
149 in-house using bioMerieux API, and BD Crystal kits at a local University of North Carolina-affiliated  
150 research facility, as described (12). Culture results were made available to clinicians within 5 days.  
151 Bacterial isolates that could be restored (~60% of isolates) were also analyzed for further confirmation  
152 of identity (not shown) on a Microflex LT MALDI-TOF mass spectrometer, using the BioTyper  
153 software version 3.1 (Bruker Daltonik, Germany).

154

155 Outcome measures: The primary outcomes of interest were *mortality*, and *culture-positive sepsis*  
156 defined as the bacterial growth of a known neonatal pathogen in blood or CSF culture sample. Micro-  
157 organisms not commonly considered as pathogens in term or near-term infants, such as coagulase-  
158 negative Staphylococcus, Micrococcus or Bacillus were excluded (14), but these potential  
159 contaminants were included in a sensitivity analysis using an alternate bacterial sepsis outcome  
160 (**Supplemental Table 1**). In-hospital mortality was recorded until discharge home or transfer to  
161 another hospital facility. Data were considered missing when infants were transferred within 72 hours  
162 after initial admission to the hospital.

163

164 Statistical Analysis: In the parent study, the sample size was set conveniently at 500 infants over 2  
165 years, but the study needed to be stopped in April 2020 due to the COVID-19 pandemic. Demographic  
166 characteristics were reported descriptively using the mean/median with dispersion. The following nine  
167 WHO DS were used as predictors: *not feeding well, convulsions, drowsy/difficult to wake, movements*  
168 *only when stimulated or no movements, fast breathing, grunting, severe chest recessions, temperature*  
169 *instability (hypo/hyperthermia), central cyanosis*. All quantitative variables were analyzed as such,  
170 except for fast breathing and temperature instability which were categorized according to WHO  
171 definitions (see above). Odds ratios were calculated for each DS and the main outcomes of bacterial  
172 sepsis or mortality. Logistic regressions were conducted between the number of DS and the main  
173 outcomes. In separate analyses, odds ratios were calculated using logistic regressions between mean  
174 DS (i.e., the number of DS divided by the available DS data) to determine the effect of missing DS  
175 data. Unadjusted logistic regression models, including demographic variables, were conducted to  
176 determine the predictive value of the DS. The predictive performance of DS for each outcome was  
177 assessed using the area under receiver operator characteristic curve (AUC-ROC). Sociodemographic  
178 variables associated with mortality, as well as their independent effects were analyzed using regression  
179 models. Only complete cases were used in the analysis. Statistical significance was considered at p-  
180 value <0.05 with no adjustment made for multiple testing in the unadjusted models. Analyses were  
181 performed using R (version 4.1.0) and SPSS (version 20; IBM, Armonk, NY, USA).

182

## 183 **Results**

184 Study population: All infants originally enrolled in the parent study were included, for a total of 401  
185 infants enrolled in the original study and included in this analysis. The majority were term or late  
186 preterm infants, born vaginally, presented from home in their first week of post-natal life, and had  
187 roughly equal female/male distribution (**Table 1**). Most infants were reported by clinicians to be ill at

188 the time of initial presentation (69.3%; 278/401), 22.2% (89/401) were severely ill, and 8.5% appeared  
 189 well (34/401). In total, 79.8% (320/401) presented at least one DS. Overall, 56.9% (228/401) of infants  
 190 had been ill for at least 24 hours prior to initial presentation, and their parents had traveled a median  
 191 distance of 17 kilometers, often by foot or taxi, to reach the nearest hospital. In total, 94/401 (23.4%)  
 192 infants had received antibiotics prior to the blood culture, for a median of 2 hours (range 0.75 to 3.5  
 193 hours). The duration of antibiotic use in infants ranged from 1 to 30 days (**Table 1**). Few infants with  
 194 negative blood culture had antibiotics discontinued after 48 hours (21/401, 5.2%).

195  
 196 **Table 1: Socio-demographic characteristics of the study population.**

| <b>Participant characteristics</b>                                        |            | <b>N with data</b> |
|---------------------------------------------------------------------------|------------|--------------------|
| Gestational age at birth (weeks), mean (SD)                               | 37.1 (3.3) | 397                |
| Birth weight (gram), mean (SD)                                            | 2865 (785) | 380                |
| Female, no (%)                                                            | 185 (46)   | 401                |
| Admitted from, no (%)                                                     |            | 401                |
| Inborn                                                                    | 161 (40)   |                    |
| Transferred from another facility                                         | 224 (56)   |                    |
| Home                                                                      | 16 (4)     |                    |
| Post-natal age at presentation (days), median (IQR)                       | 4 (2-16)   | 401                |
| Mode of delivery, no (%)                                                  |            | 398                |
| Cesarean section                                                          | 101 (25.2) |                    |
| Vaginal delivery                                                          | 297 (71.8) |                    |
| Duration of illness before presentation to hospital (hours), median (IQR) | 24 (12-48) | 341                |



|                                                                          |            |     |
|--------------------------------------------------------------------------|------------|-----|
| Distance of travel to hospital (km), median (IQR)                        | 17 (11-25) | 342 |
| Illness status, number on infants (%)                                    |            | 401 |
| Well                                                                     | 34 (8.5)   |     |
| Ill                                                                      | 278 (69.3) |     |
| Severely ill                                                             | 89 (22.2)  |     |
| Duration of antibiotics (days), median (IQR)                             | 6 (5-9)    | 401 |
| Duration of hospital stay (days), median (IQR)                           | 7 (5-9)    | 401 |
| Danger Signs, number of infants (%)                                      |            |     |
| Not feeding well                                                         | 171 (43.3) | 395 |
| Convulsions                                                              | 28 (7.0)   | 401 |
| Drowsy / Difficult to wake                                               | 33 (8.2)   | 401 |
| Movements only when stimulated or no movements                           | 26 (6.5)   | 401 |
| Fast breathing $\geq 60$ per min                                         | 104 (27.1) | 384 |
| Grunting                                                                 | 30 (7.5)   | 401 |
| Severe chest recessions                                                  | 51 (12.7)  | 401 |
| Temperature instability $>38^{\circ}\text{C}$ or $<35.5^{\circ}\text{C}$ | 118 (32.7) | 361 |
| Central cyanosis                                                         | 29 (7.2)   | 401 |

197

198

199 Outcome data: Blood (n = 85/401) and CSF (n = 2/204) cultures were positive in 21.2% and 1% of the  
200 infants, respectively. However, about half (46 / 85) had bacterial types considered to be contaminants  
201 (e.g., *bacillus*, *micrococcus*, *corynebacterium* and *coagulase-negative staphylococcus* species and non-  
202 pathogenic *streptococcus* species such as *oralis*), so the actual proportion with bacterial sepsis,  
203 considering only known pathogens in term and near-term infants, was effectively 9.7% (39/401).

204 Excluding contaminants, gram-positive bacteria (53.8%; 21/39) were slightly more prominent than  
205 gram-negative bacteria (46.2%; 18/39) (**Supplemental Table 1**). Among all infants with presumed  
206 sepsis, pathogen sepsis was more common in the inborn (17/161) than in the infants transferred from  
207 another hospital facility or from home (22/240) ( $p=0.029$ ). The proportion of gram-positive sepsis was  
208 comparable between inborn infants (10/240) versus in infants transferred from another hospital or  
209 home (11/161) ( $p=0.240$ ). Three infants were transferred before 72 hours, so among infants in whom  
210 data were available, the mortality was 9.7% (39/398), of which 61.5% (24/39) died within 48h.

211

212 Associations with mortality and culture-positive outcomes: The following DS were significantly  
213 associated with mortality (**Table 2**): *not feeding well, convulsions, drowsy/difficult to wake, movements*  
214 *only when stimulated or no movements, grunting, severe chest recessions, central cyanosis*. In contrast,  
215 *fast breathing or temperature instability* were not significantly associated with mortality. The  
216 cumulative number of DS was also significantly associated with mortality (OR 1.75 [95%CI: 1.43 –  
217 2.16] per additional DS;  $p<0.001$ ) (**Supplemental Figure 1**). Admission weight, but not age of the  
218 mother, gestational age, birth weight and sex were significantly associated with mortality  
219 (**Supplemental Table 2**). When adjusting for all of these co-variables, cumulative number of DS  
220 remained significantly associated with mortality (**Supplemental Table 2**;  $p<0.001$ ).

221 **Table 2: Associations between DS and mortality.**

| Variable                                                                 | Odds ratio (OR) | 95%CI         | P value |
|--------------------------------------------------------------------------|-----------------|---------------|---------|
| Not feeding well                                                         | 7.21            | (3.27 - 18.2) | <0.001  |
| Convulsions                                                              | 3.52            | (1.31 - 8.59) | 0.008   |
| Drowsy / Difficult to wake                                               | 5.04            | (2.12 - 11.4) | <0.001  |
| Movements only when stimulated or no movements                           | 4.89            | (1.88 - 11.9) | <0.001  |
| Fast breathing $\geq 60$ per min                                         | 1.86            | (0.87 - 3.85) | 0.100   |
| Grunting                                                                 | 3.95            | (1.54 - 9.34) | 0.002   |
| Severe chest recessions                                                  | 3.01            | (1.34 - 6.37) | 0.005   |
| Temperature instability $>38^{\circ}\text{C}$ or $<35.5^{\circ}\text{C}$ | 1.70            | (0.75 - 3.75) | 0.191   |
| Central cyanosis                                                         | 4.15            | (1.62 - 9.87) | 0.002   |

222

223

224 Bacterial sepsis with a known pathogen was significantly associated with mortality (OR 3.29 [95%CI:  
225 1.37 – 7.36];  $p = 0.005$ ). However, the only DS significantly associated with bacterial sepsis when  
226 considering only known neonatal pathogens was *not feeding well* (OR 2.04 [95%CI: 1.05 – 4.06];  
227  $p=0.038$ ) (**Table 3**). Associations between convulsions, drowsiness, lethargy (i.e., movements only  
228 when stimulated or no movement), tachypnea, grunting, severe chest recession, temperature instability  
229 and central cyanosis were all non-significant (**Table 3**). Association was between cumulative number  
230 of DS and bacterial sepsis was also non-significant (OR 1.21 [95% CI: 0.98 – 1.47];  $p=0.072$ ) in  
231 regression models (**Supplemental Figure 2**). At discharge, clinical staff selected non-bacterial sepsis  
232 in 76.3% (306/401), bacterial sepsis in 15.5% (62/401) and “other non-sepsis syndromes” in 8.2%  
233 (33/401) of cases, from these options, for study purposes.

234

235 **Table 3: Association between DS and bacterial sepsis when organism is a known pathogen.**

| Variable                                                                 | Odds ratio (OR) | 95%CI         | P value |
|--------------------------------------------------------------------------|-----------------|---------------|---------|
| Not feeding well                                                         | 2.04            | (1.05 - 4.06) | 0.038   |
| Convulsions                                                              | 0.69            | (0.11 - 2.45) | 0.626   |
| Drowsy / Difficult to wake                                               | 0.91            | (0.21 - 2.73) | 0.886   |
| Movements only when stimulated or no movements                           | 1.75            | (0.49 - 4.90) | 0.327   |
| Fast breathing $\geq 60$ per min                                         | 1.16            | (0.53 - 2.38) | 0.703   |
| Grunting                                                                 | 2.54            | (0.89 - 6.31) | 0.058   |
| Severe chest recessions                                                  | 1.61            | (0.62 - 3.71) | 0.288   |
| Temperature instability $>38^{\circ}\text{C}$ or $<35.5^{\circ}\text{C}$ | 1.80            | (0.86 - 3.70) | 0.113   |
| Central cyanosis                                                         | 0.67            | (0.11 - 2.34) | 0.588   |

236

237 When including all positive blood cultures (**Supplemental Table 3**), culture positivity was not  
238 significantly associated with mortality (OR 1.77 [95% CI: 0.83 – 3.6];  $p=0.123$ ), or any DS. The  
239 cumulative number of DS was also not significantly associated with bacterial sepsis when including  
240 positive cultures with potential bacterial contaminants (OR 1.21 [95% CI: 0.98 – 1.47];  $p=0.0715$ ).

241

## 242 **Discussion**

243 This study found that most WHO DS were significantly associated with mortality, but only one DS  
244 (i.e., not feeding well) as significantly associated with culture-proven bacterial sepsis. Additionally, the  
245 majority of DS were not associated with culture-proven bacterial sepsis in this LMIC neonatal cohort.  
246 The results held true whether only bacterial pathogens, or potential bacterial contaminants were  
247 considered. To the best of our knowledge, the current study is the first to pragmatically examine  
248 whether DS predict bacterial sepsis in infants. These findings were obtained prospectively in an LMIC

249 setting where DS were identified by front line healthcare workers as they would normally do  
250 pragmatically outside a research protocol – we assumed that this study design would more closely  
251 reflects the real-life utility of DS. Few studies have attempted to determine how DS can predict  
252 bacterial sepsis caused by bacterial pathogens in newborns or young infants. A retrospective Brazilian  
253 study reviewed data on 83 sick neonates over a 12 months period, and came to the same conclusion that  
254 DS alone or in combination did not predict severe serious bacterial infection (15). The findings of the  
255 current study are also consistent with those of another study carried out in a primary care, rural setting  
256 in Bangladesh, India and Pakistan. In the latter study, clinical signs could not differentiate infants with  
257 viral or bacterial illnesses (16). The current study findings have implications for a hospital setting, but  
258 further research is needed to determine the generalizability of the results to other hospital contexts.  
259  
260 In addition to the main findings, the current study also found that only a minor proportion of infants  
261 with suspected sepsis showed positive blood culture. Only few other studies have prospectively  
262 estimated the incidence of bacterial sepsis in LMIC cohorts, and it is therefore useful to present the  
263 current findings in the context of those other studies. A hospital centre study in Delhi, India, included  
264 13,530 neonates (all comers; mean GA±SD: 36.0±3.4 weeks) monitored daily for clinical signs of  
265 sepsis with per-protocol completion of a sepsis work-up (blood culture and lumbar puncture) prior to  
266 initiating antibiotics, and found a 14.3% incidence of culture-positive sepsis (17), which is similar to  
267 the findings of the current study. Another study in community settings in Madagascar, Senegal and  
268 Cambodia reported 8.2% culture-confirmed sepsis among 514 infants assessed for “possible serious  
269 bacterial infection” out of 3,688 neonates (18). One large study followed 12,622 live-births up to 60  
270 days of age in rural India between April 2002 and March 2005, with daily home visits and clinical  
271 assessment, and standardized blood and CSF cultures following enrollment of infants with suspected  
272 sepsis. It reported a 6.3% incidence of culture-confirmed sepsis (53 with positive blood cultures out of

273 842 infants assessed, excluding potential contaminants), for a population-level incidence of culture-  
274 confirmed sepsis of 6.7 per 1,000 births (19). Taken together, these findings suggest that bacterial  
275 sepsis may be uncommon in this age group even in LMICs, when sepsis is clinically suspected.

276

277 Blood cultures are the gold standard for diagnosing bacterial sepsis in young infants (20). However,  
278 these tests lack sensitivity in neonates (21). In the current study we were careful to prescribe a  
279 minimum blood volume to maximize culture yield. Yet, a key question is whether we misestimate the  
280 proportion of bacterial sepsis in infants in whom cultures are negative? The Aetiology of Neonatal  
281 Infection in South Asia (ANISA) study (22) also attempted to identify the cause of sepsis for 6022  
282 cases of possible serious bacterial infections in infants in the first 60 days after birth, in a population of  
283 63,114 livebirth). Bacterial and viral (e.g., respiratory syncytial virus) causes were identified in 16%  
284 and 12% of cases, respectively. For the remaining 72% cases, no pathogen could be identified despite  
285 systematic blood and respiratory cultures, which is consistent with findings from the current study.

286

287 Evidently the use of antibiotics in the current study was high, with the vast majority of infants receiving  
288 antibiotics for a minimum of five days during hospitalization, as per hospital practices. As in other  
289 LMIC settings, blood cultures were not routinely available at the study site prior to the study. As such,  
290 no approach had been developed to stop antibiotics after 48 hours given a negative blood culture. In  
291 another study in Thailand, the duration of antibiotic use was also high with durations of 15 and 8 days  
292 for culture-proven and culture-negative early-onset neonatal sepsis, respectively (23). These results  
293 highlight the need to rely on DS, and potential coercive effect of the lack of laboratory resources  
294 capable of providing basic laboratory test results to help “rule out” sepsis (24).

295

296 A strength of this study is its prospective design, with standardized blood culture procedures to ensure  
297 that the chances of contamination during blood sampling were minimized, and robust microbiological  
298 identification methods including clinical laboratory protocols on-site augmented by advanced MALDI-  
299 TOF species determination in another, North American clinical microbiology laboratory. The strong  
300 association between bacterial sepsis and mortality suggest that the infants with positive cultures were  
301 correctly identified. However, a number of study limitations should be acknowledged. Although a  
302 sizeable proportion of the recruited infants presented from home, data were collected in a single  
303 hospital-type setting; as such, caution should be exercised when generalizing to other hospital settings,  
304 or extrapolating to non-hospital primary care settings. For logistical reasons CSF was collected from  
305 only approximately half of the infants, which may have underestimated the incidence of bacterial  
306 sepsis. Moreover, due to the extremely limited diagnostic capabilities of the study LMIC settings, in  
307 most cases, causes of deaths or alternate diagnoses could not be determined. Similarly, the study did  
308 not include non-bacterial testing, which precluded identification of viral sepsis syndromes.

309

310 In conclusion, our study validates the use of WHO DS to predict fatal outcomes, but not bacterial  
311 sepsis, in young infants. This study further emphasizes the need for better diagnostics for bacterial  
312 sepsis, in order to ensure that health gains continue to improve, in areas of the world where sepsis  
313 represents a huge burden and where antimicrobial resistance is also increasing at alarming rates (25).

314

### 315 **Acknowledgments**

316 We thank Dr. David Goldfarb for expert input into data interpretation and Amber Johnson from the  
317 British Columbia Children's Hospital Microbiology Laboratory for confirming bacterial isolates by  
318 mass spectrometry.

319 **REFERENCES**

- 320 1. GBD 2016 Causes of Death Collaborators. Global, regional, and national age-sex specific mortality  
321 for 264 causes of death, 1980-2016: a systematic analysis for the Global Burden of Disease Study  
322 2016. *Lancet*. 2017;390(10100):1151-210.
- 323 2. Rudd KE, Johnson SC, Agesa KM, Shackelford KA, Tsoi D, Kievlan DR, et al. Global, regional, and  
324 national sepsis incidence and mortality, 1990-2017: analysis for the Global Burden of Disease Study.  
325 *Lancet*. 2020;395(10219):200-11.
- 326 3. Fleischmann-Struzek C, Goldfarb DM, Schlattmann P, Schlapbach LJ, Reinhart K, Kissoon N. The  
327 global burden of paediatric and neonatal sepsis: a systematic review. *The Lancet Respiratory*  
328 *medicine*. 2018;6(3):223-30.
- 329 4. Costelloe C, Metcalfe C, Lovering A, Mant D, Hay AD. Effect of antibiotic prescribing in primary  
330 care on antimicrobial resistance in individual patients: systematic review and meta-analysis. *BMJ*.  
331 2010;340:c2096.
- 332 5. Klingenberg C, Kornelisse RF, Buonocore G, Maier RF, Stocker M. Culture-Negative Early-Onset  
333 Neonatal Sepsis - At the Crossroad Between Efficient Sepsis Care and Antimicrobial Stewardship.  
334 *Front Pediatr*. 2018;6:285.
- 335 6. Costello A. Integrated management of childhood illness. *Lancet*. 1997;350(9087):1266.
- 336 7. Young Infants Clinical Signs Study Group. Clinical signs that predict severe illness in children under  
337 age 2 months: a multicentre study. *The Lancet*. 2008;371(9607):135-42.
- 338 8. Opiyo N, English M. What clinical signs best identify severe illness in young infants aged 0-59 days  
339 in developing countries? A systematic review. *Archives of disease in childhood*. 2011;96(11):1052-  
340 9.



- 341 9. World Health Organization. Pocket Book of Hospital Care for Children: Guidelines for the  
342 Management of Common Childhood Illnesses. WHO Guidelines Approved by the Guidelines  
343 Review Committee. 2nd ed. Geneva, 2013.
- 344 10. Wynn JL, Polin RA. Progress in the management of neonatal sepsis: the importance of a consensus  
345 definition. *Pediatr Res*. 2018;83(1-1):13-5.
- 346 11. Clinical prediction of serious bacterial infections in young infants in developing countries. The WHO  
347 Young Infants Study Group. *Pediatr Infect Dis J*. 1999;18(10 Suppl):S23-31.
- 348 12. Popescu CR, Tembo B, Chifisi R, Cavanagh MMM, Lee AH, Chiluzi B, et al. Whole blood genome-  
349 wide transcriptome profiling and metagenomics next-generation sequencing in young infants with  
350 suspected sepsis in a low-and middle-income country: A study protocol. *Gates Open Res*.  
351 2020;4:139.
- 352 13. Popescu C, Tembo B, Chifisi R, Cavanagh M, Chiluzi B, Lufesi N, et al. Procedure policies, data  
353 collection form and model consent form (supplemental material)~Improving the Early Diagnosis of  
354 Neonatal Sepsis in Malawi. In: *Scholars Portal Dataverse*, editor. 2 ed 2020.
- 355 14. Downie L, Armiento R, Subhi R, Kelly J, Clifford V, Duke T. Community-acquired neonatal and  
356 infant sepsis in developing countries: efficacy of WHO's currently recommended antibiotics--  
357 systematic review and meta-analysis. *Archives of disease in childhood*. 2013;98(2):146-54.
- 358 15. Ronfani L, Vilarim JN, Dragovich D, Bacalhau AF, Cattaneo A. Signs of severe bacterial infection  
359 in neonates. *J Trop Pediatr*. 1999;45(1):48-51.
- 360 16. Arvay ML, Shang N, Qazi SA, Darmstadt GL, Islam MS, Roth DE, et al. Infectious aetiologies of  
361 neonatal illness in south Asia classified using WHO definitions: a primary analysis of the ANISA  
362 study. *The Lancet Global health*. 2022;10(9):e1289-e97.
- 363 17. Study IotDNI. Characterisation and antimicrobial resistance of sepsis pathogens in neonates born in  
364 tertiary care centres in Delhi, India: a cohort study. *The Lancet Global health*. 2016;4(10):e752-60.

- 365 18. Huynh BT, Kermorvant-Duchemin E, Chheang R, Randrianirina F, Seck A, Ratsima EH, et al. Severe  
366 bacterial neonatal infections in Madagascar, Senegal, and Cambodia: A multicentric community-  
367 based cohort study. *Plos Medicine*. 2021;18(9).
- 368 19. Panigrahi P, Chandel DS, Hansen NI, Sharma N, Kandefer S, Parida S, et al. Neonatal sepsis in rural  
369 India: timing, microbiology and antibiotic resistance in a population-based prospective study in the  
370 community setting. *J Perinatol*. 2017;37(8):911-21.
- 371 20. Polin RA. Management of neonates with suspected or proven early-onset bacterial sepsis. *Pediatrics*.  
372 2012;129(5):1006-15.
- 373 21. Popescu CR, Cavanagh MMM, Tembo B, Chiume M, Lufesi N, Goldfarb DM, et al. Neonatal sepsis  
374 in low-income countries: epidemiology, diagnosis and prevention. *Expert Rev Anti Infect Ther*.  
375 2020;18(5):443-52.
- 376 22. Saha SK, Schrag SJ, El Arifeen S, Mullany LC, Shahidul Islam M, Shang N, et al. Causes and  
377 incidence of community-acquired serious infections among young children in south Asia (ANISA):  
378 an observational cohort study. *Lancet*. 2018;392(10142):145-59.
- 379 23. Kiatchoosakun P, Jirapradittha J, Sirikarn P, Laopaiboon M, Pattanittum P, Chandrakachorn W, et  
380 al. Early-Onset Neonatal Sepsis and Antibiotic Use in Northeast Thailand. *Am J Perinatol*.  
381 2019;36(12):1295-303.
- 382 24. Lavoie PM, Popescu CR, Molyneux EM, Wynn JL, Chiume M, Keitel K, et al. Rethinking  
383 management of neonates at risk of sepsis. *Lancet*. 2019;394(10195):279-81.
- 384 25. Iregbu K, Dramowski A, Milton R, Nsutebu E, Howie SRC, Chakraborty M, et al. Global health  
385 systems' data science approach for precision diagnosis of sepsis in early life. *Lancet Infect Dis*.  
386 2022;22(5):e143-e52.
- 387
